# Supplementary material
Source: PubMed Central journal article supplement (PMC5846089)
Supplement: NIHMS945169-supplement-Figuire_S7.pdf [file NIHMS945169-supplement-Figuire_S7.pdf]

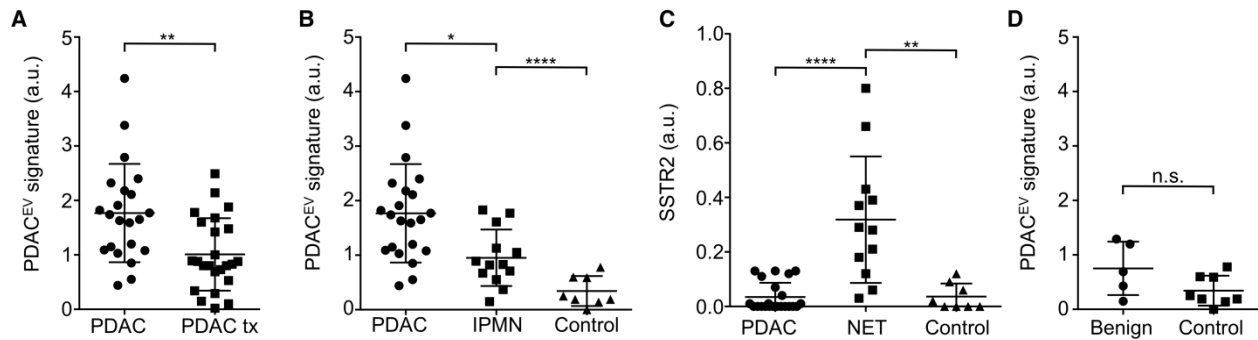

**Fig. S7. Comparison of the PDAC<sup>EV</sup> signature and SSTR2 in different patient cohorts.** The statistical significance of the PDAC<sup>EV</sup> signature (EPCAM, EGFR, MUC1, WNT2, and GPC1) and SSTR2 was evaluated in different cohorts of patients. **(A)** PDAC and PDAC treated with neoadjuvant regimen ( $p = 0.0015$ ). **(B)** PDAC, IPMN, and age-matched controls ( $p = 0.022$ ,  $p < 0.0001$ ). **(C)** SSTR2 for PDAC, neuroendocrine tumors (NET), and age-matched controls ( $p < 0.0001$ ,  $p = 0.0018$ ). **(D)** Benign cystic tumor and age-matched controls ( $p = 0.35$ ). The  $p$ -values were calculated using the nonparametric Mann Whitney test for two groups. For more than two groups, the  $p$ -values for pairwise comparisons were calculated using the Dunn's multiple comparison test.
