# Supplementary material
Source: PubMed Central journal article supplement (PMC5846089)
Supplement: NIHMS945169-supplement-Figure_S1.pdf [file NIHMS945169-supplement-Figure_S1.pdf]

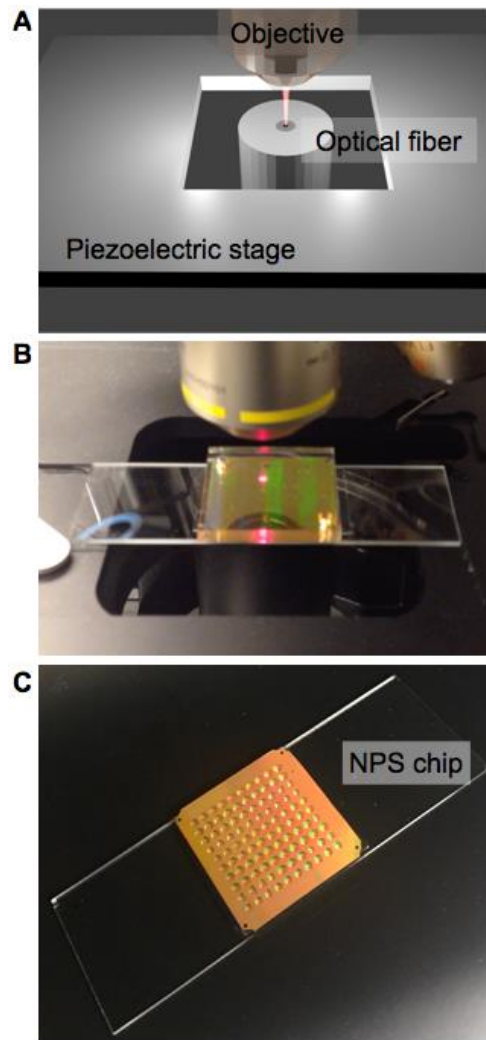

**Fig. S1. NPS setup.** (A) Schematics of NPS measurement setup on an upright microscope. (B) Photograph of NPS setup on a piezoelectric autostage. (C) Photograph of a NPS chip with 100 sensing arrays.
