# Supplementary material
Source: PubMed Central journal article supplement (PMC5846089)
Supplement: NIHMS945169-supplement-Figure_S2.pdf [file NIHMS945169-supplement-Figure_S2.pdf]

### A Cells

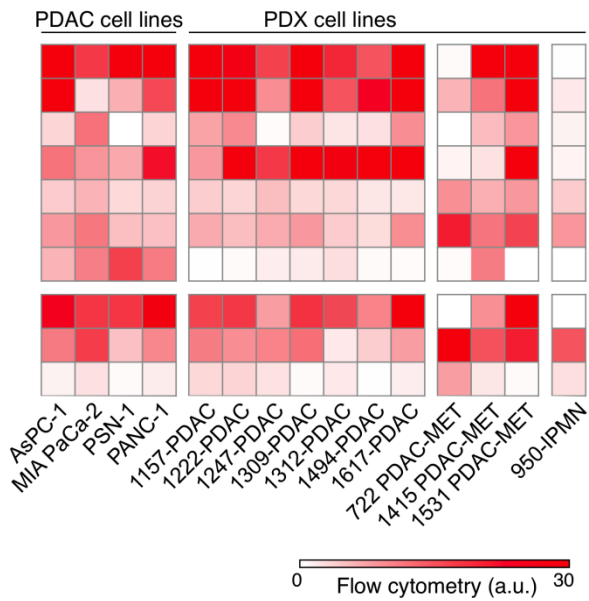

### B EVs

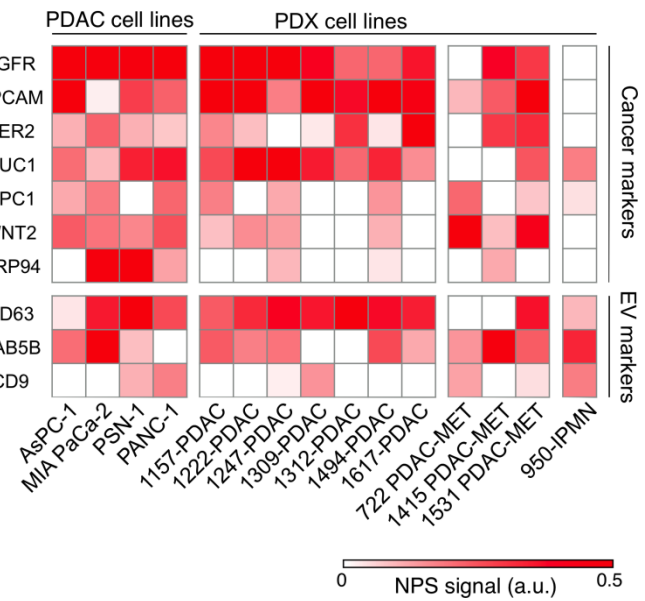

**Fig. S2. Comparison of PDAC and EV markers on cells and EVs.** Cell lines and their corresponding EVs were profiled for the molecular expression of cancer markers (EGFR, EPCAM, HER2, MUC1, GPC1, WNT2, GRP94) and EV markers (CD63, RAB5B, CD9). Four cancer cell lines and 11 patient-derived xenograft (PDX) cell lines including PDAC, metastatic PDAC (PDAC-MET), and IPMN were analyzed by flow cytometry for cell lines and NPS for EVs.
