# Supplementary material
Source: PubMed Central journal article supplement (PMC5846089)
Supplement: NIHMS945169-supplement-Figure_S3.pdf [file NIHMS945169-supplement-Figure_S3.pdf]

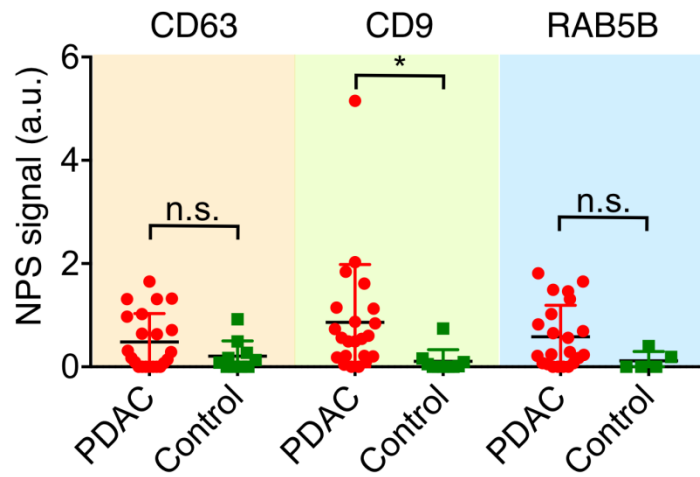

**Fig. S3. EV markers in a training cohort.** CD63, CD9, and RAB5B are markers highly expressed in extracellular vesicles, but do not provide diagnostic information for PDAC ( $p = 0.15$  for CD63;  $p = 0.045$  for CD9;  $p = 0.11$  for RAB5B). The  $p$ -values are calculated using the nonparametric Mann Whitney test.
