# Supplementary material
Source: PubMed Central journal article supplement (PMC5846089)
Supplement: NIHMS945169-supplement-Figure_S4.pdf [file NIHMS945169-supplement-Figure_S4.pdf]

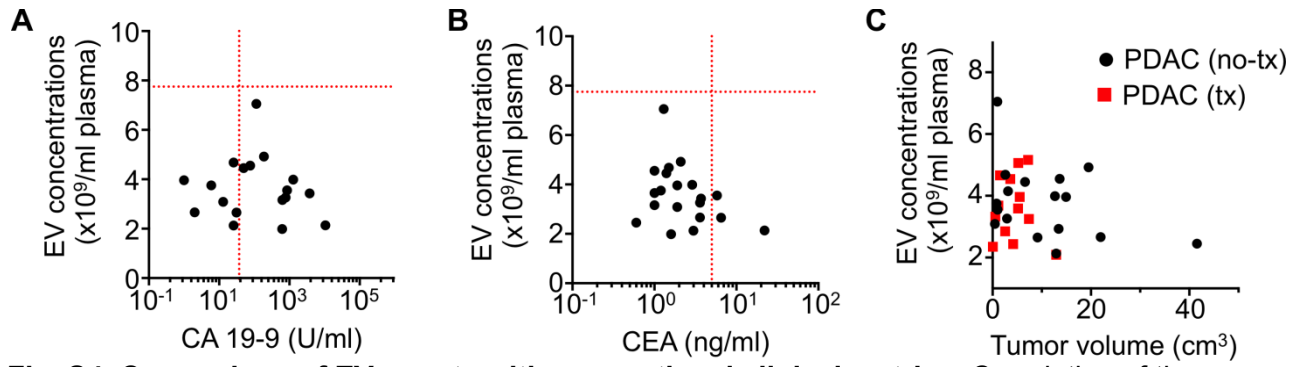

**Fig. S4. Comparison of EV counts with conventional clinical metrics.** Correlation of the total EV counts with serum biomarkers (CA 19-9, **A** and CEA, **B**) and the tumor diameter (**C**) for patients with PDAC. The dashed red lines indicate the threshold values for positivity (CA 19-9, 37 U/ml; CEA, 5 ng/ml; PDAC<sup>EV</sup> signature, 1; EV count, 7.8 x 10<sup>9</sup>/ml).
