# Supplementary material
Source: PubMed Central journal article supplement (PMC5846089)
Supplement: NIHMS945169-supplement-Figure_S5.pdf [file NIHMS945169-supplement-Figure_S5.pdf]

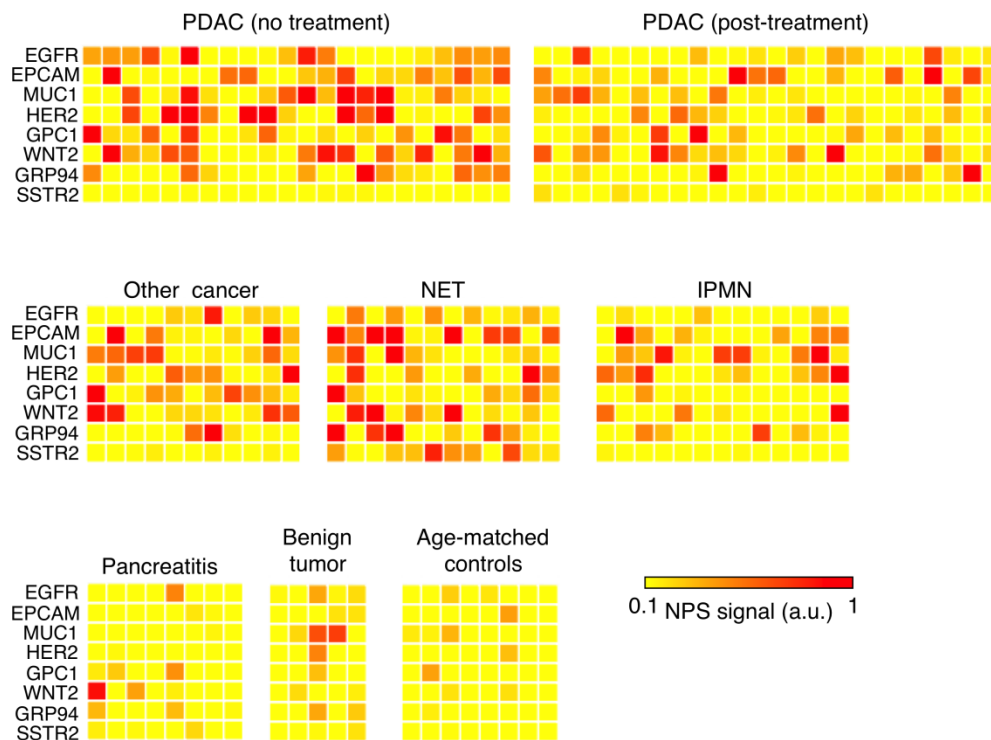

**Fig. S5. NPS signal from validation cohort tEVs.** Plasma from patients undergoing surgery for PDAC, IPMN, other pancreatic cancers, NET, pancreatitis, or other benign or non-cancerous diseases was profiled using NPS for the indicated surface protein markers.
