# Supplementary material
Source: PubMed Central journal article supplement (PMC5846089)
Supplement: NIHMS945169-supplement-Figure_S6.pdf [file NIHMS945169-supplement-Figure_S6.pdf]

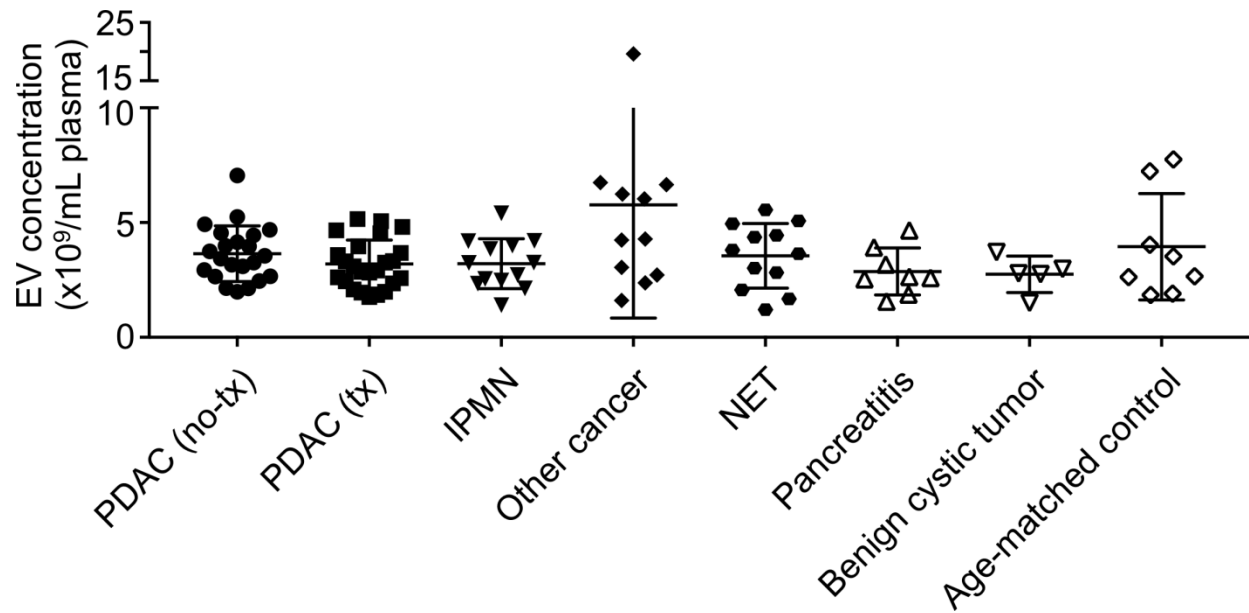

**Fig. S6. EV counts for patients with different types of pancreatic diseases.** The total EV counts were measured for patient cohorts ( $n = 103$ ) including i) PDAC without treatment ( $n = 22$ ), ii) PDAC treated with neoadjuvant regimen ( $n = 24$ ), iii) IPMN ( $n = 13$ ), iv) other GI cancers mimicking the symptoms of pancreatico-duodenal cancers ( $n = 11$ ), v) pancreatic neuroendocrine tumors ( $n = 12$ ), vi) pancreatitis ( $n = 8$ ), vii) benign cystic tumors, and ( $n = 5$ ) and ix) age-matched controls ( $n = 8$ ).
