# Supplementary material
Source: PubMed Central journal article supplement (PMC5846089)
Supplement: NIHMS945169-supplement-Table_S1.pdf [file NIHMS945169-supplement-Table_S1.pdf]

**Table S1. Antibodies used in flow cytometry and NPS.**

| Type                                        | Antibody                                                        | Company             | Catalog Number          | Species                 | Use                         |
|---------------------------------------------|-----------------------------------------------------------------|---------------------|-------------------------|-------------------------|-----------------------------|
| <b>Primary antibodies<br/>EV antibodies</b> | Glypican-1 Biotinylated                                         | R&D Systems         | BAF4519                 | Polyclonal Goat IgG     | Flow-WB-TED                 |
|                                             | Glypican-1                                                      | Thermo              | PA5-24972               | Polyclonal Rabbit IgG   | WB-IHC-Flow-TED             |
|                                             | WNT2                                                            | Novus               | 22950002                | Polyclonal Rabbit IgG   | ELISA-IHC-TED               |
|                                             | MET                                                             | Sigma               | SAB4501870              | Polyclonal Rabbit IgG   | ELISA-IF-TED                |
|                                             | CD45                                                            | Abcam               | ab33533                 | Monoclonal Mouse IgG1   | ICC/IF-ELISA-Flow-IP-WB-TED |
|                                             | MUC1                                                            | Fitzgerald          | 10-M93B                 | Monoclonal Mouse IgG    | ELISA-IHC-WB-TED            |
|                                             | HER2                                                            | BioLegend           | 324402                  | Mouse IgG1-κ            | Flow-IF-TED                 |
|                                             | EPCAM                                                           | Abcam               | ab20160                 | Monoclonal Mouse IgG1-κ | ICC/IF-Flow-ELISA-IHC-TED   |
|                                             | EGFR-Biotin                                                     | Abcam               | ab24293                 | Monoclonal Mouse IgG2b  | Flow-IHC-TED                |
|                                             | CD44V6                                                          | Abcam               | ab78960                 | Monoclonal Mouse IgG1   | WB-IHC-ICC-Flow-IHC-TED     |
|                                             | B7-H3 <sup>1)</sup>                                             | <i>Collaborator</i> | <i>Soldano Ferrone</i>  | Mouse IgG2a             | Flow-TED                    |
|                                             | GRP94 <sup>2)</sup>                                             | <i>Collaborator</i> | <i>Soldano Ferrone</i>  | Human IgG1              | Flow-TED                    |
|                                             | Somatostatin R2 (SSTR2)                                         | R&D Systems         | MAB4224                 | Monoclonal Mouse IgG2a  | IHC-IF-Flow-TED             |
|                                             | CD9                                                             | Abcam               | ab92726                 | Monoclonal Rabbit IgG   |                             |
|                                             | RAB5B                                                           | Santa Cruz          | sc-598                  | Polyclonal Rabbit IgG   | WB-IP-IF-IHC-ELISA-TED      |
| CD63                                        | BD Biosciences                                                  | 556019              | Monoclonal Mouse IgG1-κ | Flow-IHC-TED            |                             |
| CD63-Biotin                                 | Ancell                                                          | 215-030             | Monoclonal Mouse IgG1   | Flow-TED                |                             |
| <b>Secondary and control antibodies</b>     | Donkey anti-goat IgG (H+L) secondary antibody-Alexa Fluor 488   | ThermoFisher        | A-11055                 | Donkey IgG              | Flow-ICC-IF-IHC             |
|                                             | Donkey anti-rabbit IgG (H+L) secondary antibody-Alexa Fluor 488 | Abcam               | ab150073                | Donkey IgG              | ICC/IF-Flow-IHC-ELISA       |

|                                                              |                    |                  |               |                             |
|--------------------------------------------------------------|--------------------|------------------|---------------|-----------------------------|
| Goat anti-mouse IgG (H+L) secondary antibody-Alexa Fluor 488 | Abcam              | ab150117         | Goat IgG      | IHC-ICC/IF-Flow-ELISA       |
| Mouse anti-human IgG1 Fc secondary antibody-Alexa Fluor 488  | ThermoFisher       | A-10631          | Mouse IgG1    | Flow-IF                     |
| Goat IgG isotype control                                     | ThermoFisher       | 02-6202          | Goat IgG      | Flow-TED                    |
| Rabbit IgG monoclonal isotype control                        | Abcam              | ab172730         | Rabbit IgG    | ICC/IF-Flow-IHC-ChipSeq-TED |
| Mouse IgG1-κ isotype control                                 | Biologend          | 400102           | Mouse IgG1-κ  | Flow-TED                    |
| Mouse IgG2b-κ monoclonal isotype control                     | Abcam              | ab18469          | Mouse IgG2b-κ | IHC-WB-Flow-IP-TED          |
| Mouse IgG1 isotype control                                   | R&D Systems        | MAB002           | Mouse IgG1    | Flow-TED                    |
| Mouse IgG2a isotype control                                  | ThermoFisher       | MG2A00           | Mouse IgG2a   | Flow-TED                    |
| Human IgG1 isotype control                                   | Enzo Life Sciences | ALX-804-133-C100 | Human IgG1    | ELISA-Flow-IP-WB-TED        |

<sup>1)</sup> The B7-H3(40; 41) and <sup>2)</sup> Grp94(30) antibodies are provided by Dr. Soldano Ferrone's lab.
